# Supplementary material
Source: Research Square preprint supplement (doi:10.21203/rs.3.rs-9183112/v1)
Supplement: Supplementary file 1 [file c8d83c8ab666d9fbf0e5d083.xlsx]

## Sheet: Sheet1
ID in the paper	Organism Infraspecific Names Strain	Assembly Accession	Location
ATCC 27544	ATCC 27545	GCA_000385075.1_ASM38507v1_genomic.fna	USA
2	H34	GCA_000759385.1_ASM75938v1_genomic.fna	Russia
3	PL5	GCA_000935865.1_ASM93586v1_genomic.fna	USA
4	AF3	GCA_000935875.1_ASM93587v1_genomic.fna	USA
5	387_MHOM	GCA_001063275.1_ASM106327v1_genomic.fna	USA
6	403_MHOM	GCA_001063305.1_ASM106330v1_genomic.fna	USA
7	M57	GCA_001906845.1_ASM190684v1_genomic.fna	Russia
8	M45	GCA_001906855.1_ASM190685v1_genomic.fna	Russia
9	MH529	GCA_003287375.1_ASM328737v1_genomic.fna	Russia
10	MH621	GCA_003298555.1_ASM329855v1_genomic.fna	Russia
11	MH1002	GCA_003298565.1_ASM329856v1_genomic.fna	Russia
12	MH1019	GCA_003298635.1_ASM329863v1_genomic.fna	Russia
13	MH1991	GCA_003326045.1_ASM332604v1_genomic.fna	Russia
14	MH1866	GCA_003326075.1_ASM332607v1_genomic.fna	Russia
15	MH1817	GCA_003326095.1_ASM332609v1_genomic.fna	Russia
16	MH1861	GCA_003326125.1_ASM332612v1_genomic.fna	Russia
17	MH-1	GCA_009709645.1_ASM970964v1_genomic.fna	China
18	MH15-3	GCA_014779565.1_ASM1477956v1_genomic.fna	UK
19	MH13-7	GCA_016809535.1_ASM1680953v1_genomic.fna	UK
20	ah3-36	GCA_016809545.1_ASM1680954v1_genomic.fna	UK
21	ah3-20	GCA_016809575.1_ASM1680957v1_genomic.fna	UK
22	ah3-28	GCA_016809585.1_ASM1680958v1_genomic.fna	UK
23	MH13-5	GCA_016809615.1_ASM1680961v1_genomic.fna	UK
24	MH06-12	GCA_016809635.1_ASM1680963v1_genomic.fna	UK
25	MH12-9	GCA_016809655.1_ASM1680965v1_genomic.fna	UK
26	MH10-4	GCA_016809675.1_ASM1680967v1_genomic.fna	UK
27	MH13-4	GCA_016809685.1_ASM1680968v1_genomic.fna	UK
28	MH10-15	GCA_016809715.1_ASM1680971v1_genomic.fna	UK
29	MH06-11	GCA_016809735.1_ASM1680973v1_genomic.fna	UK
30	MH06-01	GCA_016809755.1_ASM1680975v1_genomic.fna	UK
31	MH05-14	GCA_016809785.1_ASM1680978v1_genomic.fna	UK
32	H34overDeoA	GCA_020089555.1_ASM2008955v1_genomic.fna	Russia
33	H34	GCA_020089585.1_ASM2008958v1_genomic.fna	Russia
34	MIN-135	GCA_021461185.1_ASM2146118v1_genomic.fna	UK
35	MH4246	GCA_026967455.1_ASM2696745v1_genomic.fna	China
36	M132	GCA_030701665.1_ASM3070166v1_genomic.fna	France
37		GCA_032577075.1_ASM3257707v1_genomic.fna	USA
38	MHO40	GCA_040895835.1_ASM4089583v1_genomic.fna	Russia
39	MHO45	GCA_040895855.1_ASM4089585v1_genomic.fna	Russia
40	MHO1862	GCA_040895875.1_ASM4089587v1_genomic.fna	Russia
41	MHO12	GCA_040895895.1_ASM4089589v1_genomic.fna	Russia
42	MHO7	GCA_040895915.1_ASM4089591v1_genomic.fna	Russia
43	MHO43	GCA_040895935.1_ASM4089593v1_genomic.fna	Russia
44	MHO11	GCA_040895975.1_ASM4089597v1_genomic.fna	Russia
45	MHO33	GCA_040895995.1_ASM4089599v1_genomic.fna	Russia
46		GCA_946892225.1_SRR12830915_bin.6_metaWRAP_v1.3_MAG_genomic.fna	UK
47		GCA_946998435.1_SRR16916867_bin.9_metaWRAP_v1.3_MAG_genomic.fna	UK
48		GCA_947038395.1_ERR4705195_bin.12_metaWRAP_v1.3_MAG_genomic.fna	UK
49		GCA_947087235.1_SRR11749279_bin.17_metaWRAP_v1.3_MAG_genomic.fna	UK
50		GCA_947252955.1_SRR17635503_bin.3_metaWRAP_v1.3_MAG_genomic.fna	UK
ZYMH01	ZYMH01	JBFWID000000000	China
